# Supplementary material
Source: PubMed Central journal article supplement (PMC4837000)
Supplement: NIHMS760357-supplement-supplement_1.pdf [file NIHMS760357-supplement-supplement_1.pdf]

**SUPPLEMENTAL TABLE. Association of migraine and suicidal ideation stratified by depression status**

| Participants<br>Without Depression | No suicidal ideation<br>(N = 2137) |      | Suicidal ideation<br>(N = 295) |      |                           |                                      |
|------------------------------------|------------------------------------|------|--------------------------------|------|---------------------------|--------------------------------------|
|                                    | n                                  | %    | n                              | %    | Unadjusted OR<br>(95% CI) | Adjusted OR<br>(95% CI) <sup>a</sup> |
| No migraine                        | 1544                               | 72.3 | 168                            | 56.9 | Reference                 | Reference                            |
| Any migraine                       | 593                                | 27.7 | 127                            | 43.1 | 1.97 (1.53-2.53)          | 1.80 (1.40-2.32)                     |
| Types of migraine                  |                                    |      |                                |      |                           |                                      |
| No migraine                        | 1544                               | 72.3 | 168                            | 56.9 | Reference                 | Reference                            |
| Probable migraine                  | 408                                | 19.1 | 90                             | 30.5 | 2.03 (1.54-2.68)          | 1.86 (1.40-2.47)                     |
| Migraine                           | 185                                | 8.7  | 37                             | 12.5 | 1.84 (1.25-2.71)          | 1.67 (1.13-2.47)                     |
| Participants<br>With Depression    | No suicidal ideation<br>(N = 636)  |      | Suicidal ideation<br>(N = 229) |      |                           |                                      |
|                                    | n                                  | %    | n                              | %    | Unadjusted OR<br>(95% CI) | Adjusted OR<br>(95% CI) <sup>a</sup> |
| No migraine                        | 373                                | 58.6 | 99                             | 43.2 | Reference                 | Reference                            |
| Any migraine                       | 263                                | 41.4 | 130                            | 56.8 | 1.86 (1.37-2.53)          | 1.75 (1.28-2.39)                     |
| Types of migraine                  |                                    |      |                                |      |                           |                                      |
| No migraine                        | 373                                | 58.6 | 99                             | 43.2 | Reference                 | Reference                            |
| Probable migraine                  | 149                                | 23.4 | 64                             | 27.9 | 1.62 (1.12-2.34)          | 1.56 (1.08-2.27)                     |
| Migraine                           | 114                                | 17.9 | 66                             | 28.8 | 2.18 (1.50-3.18)          | 2.00 (1.36-2.93)                     |

Abbreviations: OR, odds ratio; CI, confidence interval

a. Adjusted for age, marital status, difficulty paying for the very basics, difficulty paying for medical care
